# Supplementary material for: Proliferative and Osteogenic Supportive Effect of VEGF-Loaded Collagen-Chitosan Hydrogel System in Bone Marrow Derived Mesenchymal Stem Cells
Source: MDPI journal article supplement (doi:10.3390/pharmaceutics15041297), 2023-04-20
Supplement: s1 [file s1]

# Proliferative and Osteogenic Supportive Effect of VEGF-loaded Collagen-Chitosan Hydrogel System in Bone Marrow derived Mesenchymal Stem Cells

Jeevithan Elango <sup>1,2,3</sup>

<sup>1</sup> Department of Biomaterials Engineering, Faculty of Health Sciences, UCAM- Universidad Católica San Antonio de Murcia, Campus de los Jerónimos 135, Guadalupe, 30107 Murcia, Spain; srijeevithan@gmail.com or jelango@ucam.edu; Tel.: +34-6-0359-7596

<sup>2</sup> Center of Molecular Medicine and Diagnostics (COMManD), Department of Biochemistry, Saveetha Dental College and Hospitals, Saveetha Institute of Medical and Technical Sciences, Saveetha University, Chennai 600077, India

<sup>3</sup> Department of Marine Biopharmacology, College of Food Science and Technology, Shanghai Ocean University, Shanghai 201306, China

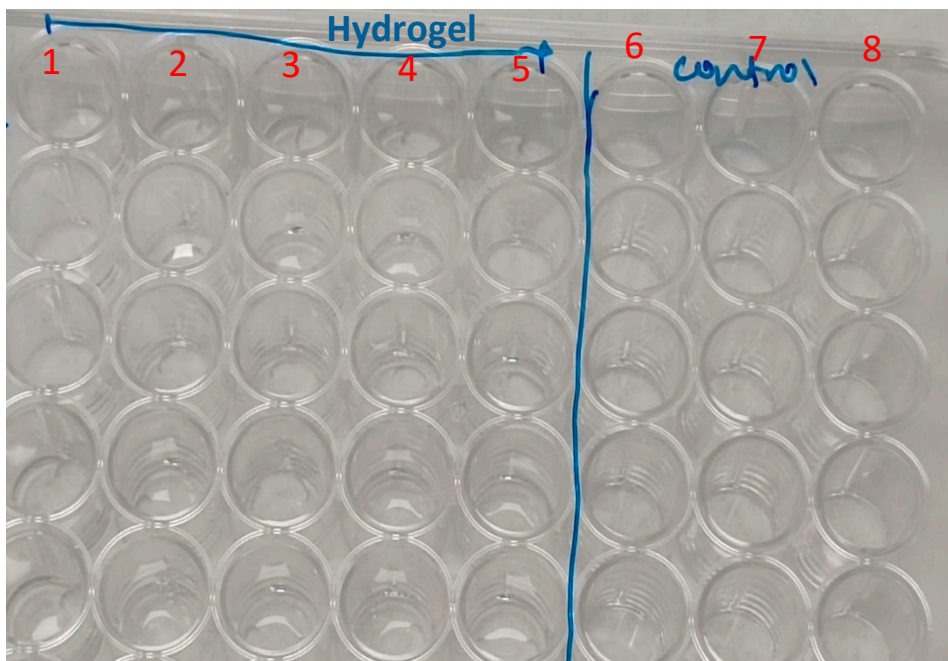

**Supplementary Figure S1.** The cell culture plate coated with collagen-chitosan hydrogels before mesenchymal stem cell seeding. 1:-PBS, 2:-HG, 3:-HG-25, 4:-HG-50, 5:- HG-100 and 6-8:- control groups.
